# Supplementary material
Source: Springer Nature journal article supplement (https://www.springermedizin.de/resource/supplementary/12874_2012_917_MOESM8_ESM.pdf/9433150)
Supplement: MOESM8 [file 9433150]

What are the views, preferences and attitudes of employees to workplace smoking cessation or reduction interventions or strategies?

Systematically identified relevant ("best fit") publications of frameworks, conceptual models or theories using the BeHEMoTh approach

Systematically identified 15 relevant primary research studies with qualitative evidence using the SPIDER approach supplemented with other methods

An *a priori* framework with 11 themes was generated from five identified publication(s) using thematic analysis

Data on study characteristics were extracted from 15 included studies and the quality of the studies was appraised

Findings and evidence from 15 included studies were coded against the *a priori* framework. All themes in the framework were supported by evidence from the included studies

Six new themes were created through thematic analysis of evidence that could not be coded against the framework

A new, context-specific framework was produced composed of both the *a priori* and the new themes

Evidence was revisited to explore relationships between themes in framework, thus creating a model  
This synthesis and model was tested by exploring issues of dissonance and the impact of variables such as quality
